# Supplementary material
Source: PubMed Central journal article supplement (PMC5607060)
Supplement: NIHMS871909-supplement-1.pdf [file NIHMS871909-supplement-1.pdf]

**SUPPLEMENTAL MATERIAL**

**Histone demethylases *kdm6ba* and *kdm6bb* redundantly promote cardiomyocyte proliferation during zebrafish heart ventricle maturation**

Alexander A. Akerberg, Astra Henner, Scott Stewart, and Kryn Stankunas

*kdm6bb*<sup>+/-</sup>**A**

ora 3 4 5 6

h

*tg(kdrl:EGFP)*

72 hpf

*kdm6bb*<sup>-/-</sup>**B**

ora 3 4 5 6

h

*tg(kdrl:EGFP)*

72 hpf

*kdm6ba*<sup>+/-</sup>**C**

ora 3 4 5 6

h

*tg(kdrl:EGFP)*

72 hpf

*kdm6ba*<sup>-/-</sup>**D**

ora 3 4 5 6

h

*tg(kdrl:EGFP)*

72 hpf

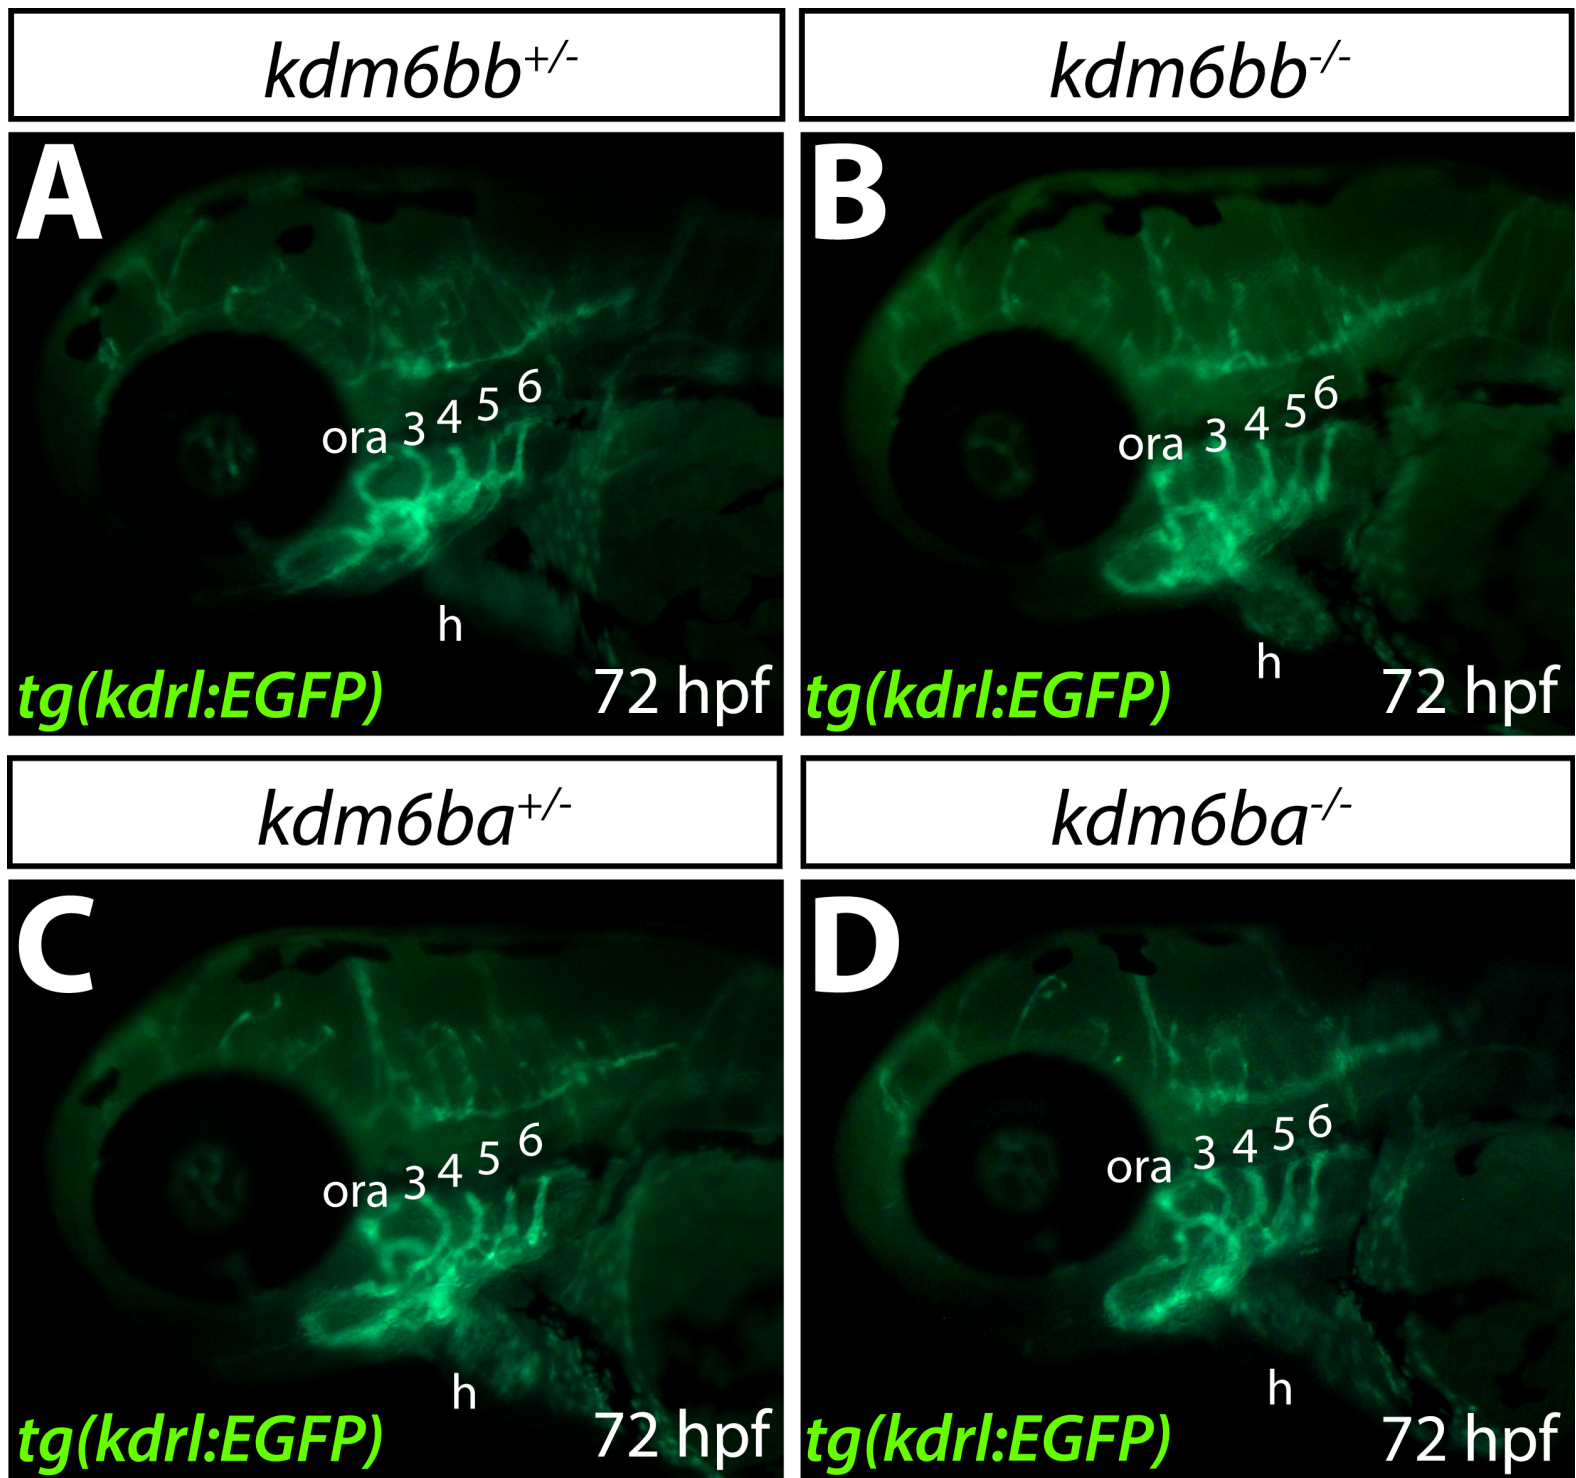

**Figure S1. Aortic artery organization is unperturbed in *kdm6bb*<sup>-/-</sup> and *kdm6ba*<sup>-/-</sup> zebrafish.**

(A-D) Fluorescent whole mount images of 72 hpf *Tg(kdrl:EGFP)* zebrafish larvae highlighting the aortic arch arteries of control (A, C), *kdm6bb*<sup>-/-</sup> (B), and *kdm6ba*<sup>-/-</sup> (D) animals.

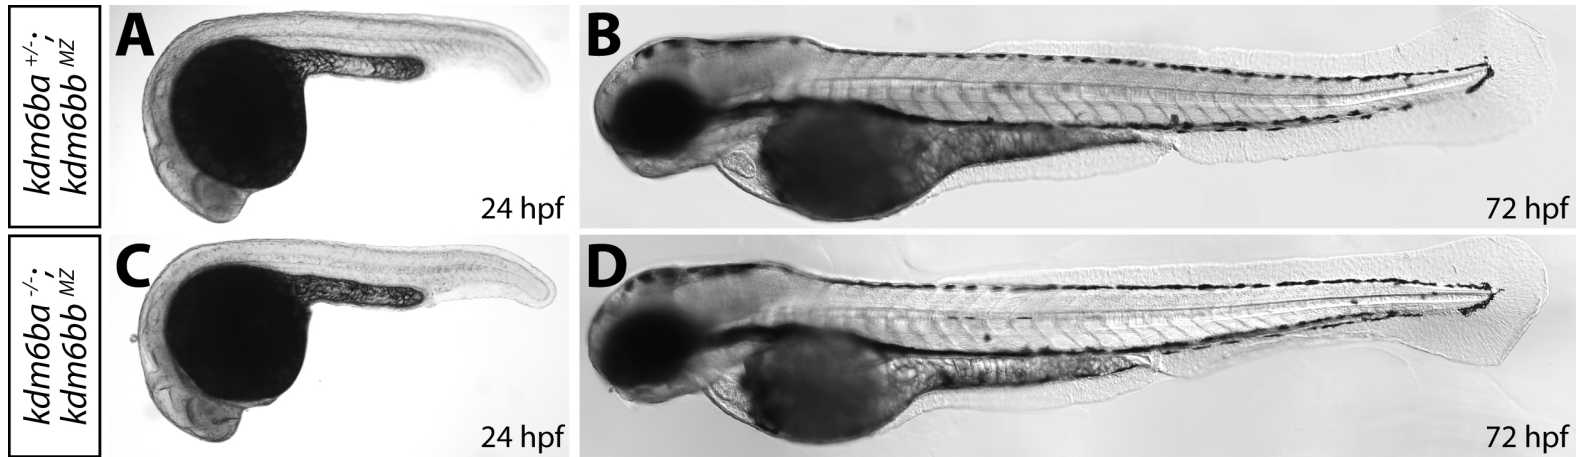

**Figure S2. *kdm6b*-deficient zebrafish complete embryonic development without overt defects.**

(A-D) Whole mount DIC microscopy images of 24 hpf and 72 hpf control (A, B) and *kdm6ba/kdm6bb* homozygous mutant (C, D) embryos.

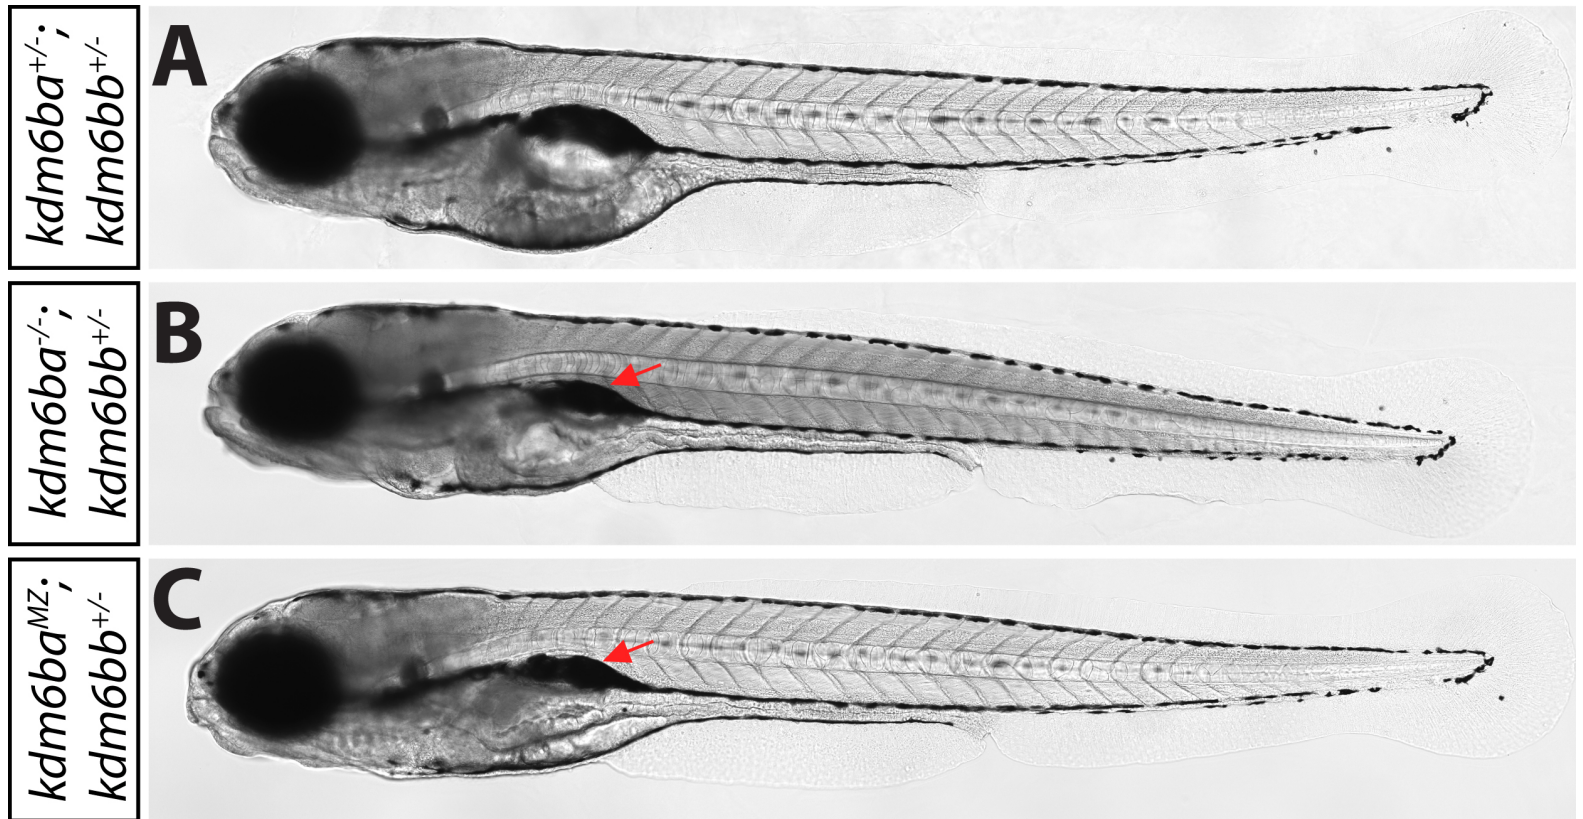

**Figure S3. Depletion of maternal and zygotic *kdm6ba/kdm6bb* transcripts does not affect early embryonic development.**

(A-C) DIC imaged 5 dpf progeny of the indicated genotypes from a *kdm6bb*<sup>+/-</sup>; *kdm6bb*<sup>+/-</sup> in-cross (A, B) and a cross between a *kdm6ba*<sup>-/-</sup>; *kdm6bb*<sup>+/+</sup> female and *kdm6ba*<sup>+/-</sup>; *kdm6bb*<sup>-/-</sup> male (C). Arrows indicate an un-inflated swim bladder.

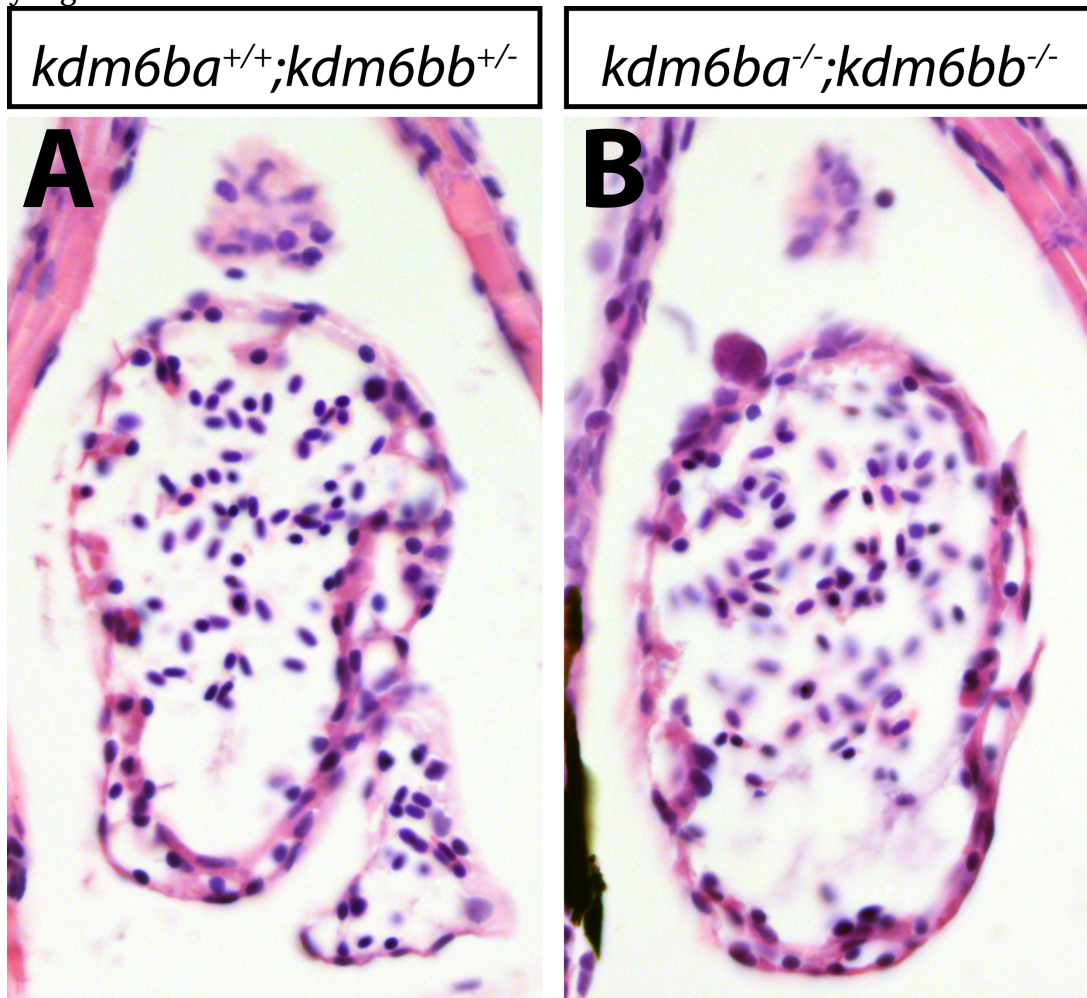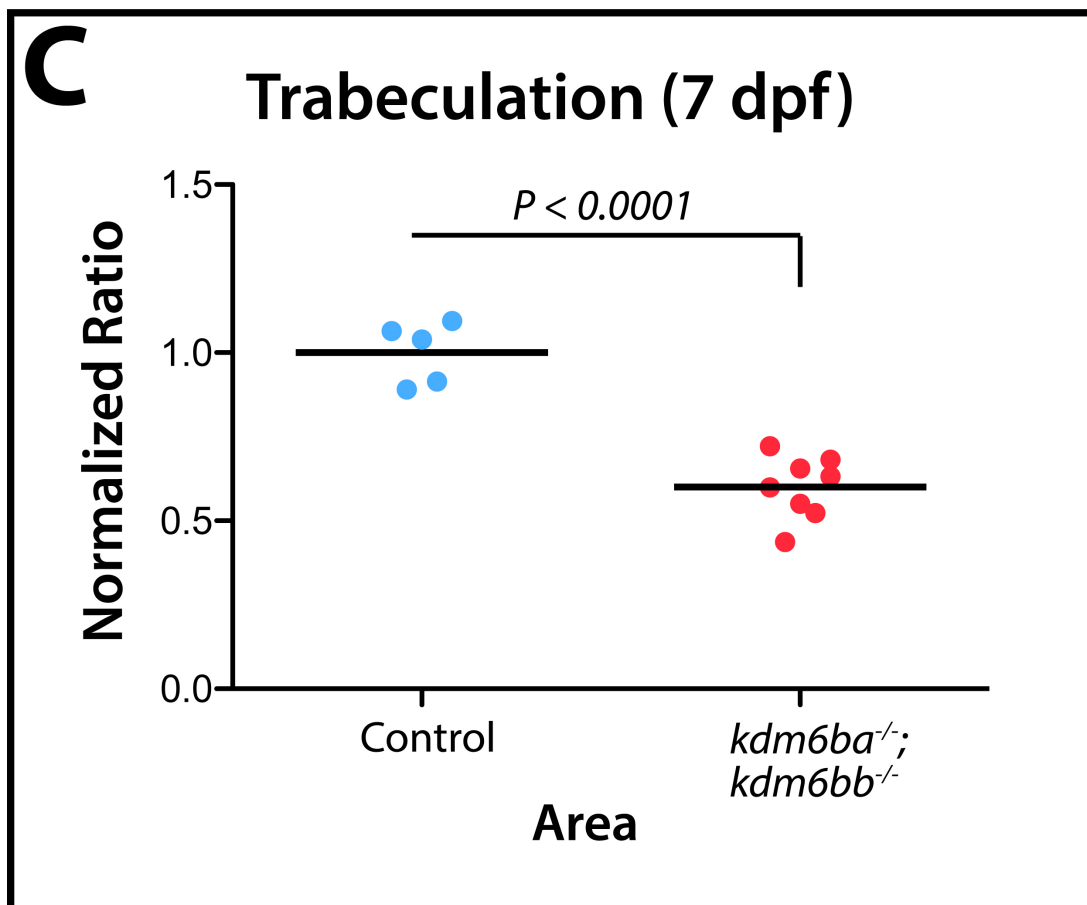



**Figure S4. Decreased ventricular area in coronal sections of 7 dpf *kdm6b*-deficient embryos.**

(A-B) H&E-stained paraffin coronal sections showing the ventricle of 7 dpf control and *kdm6b*-deficient larvae. (C) Scatterplot graphs showing the clutch-normalized trabeculated ventricle area measured on matched ventricular coronal sections from 7 dpf control and *kdm6ba*<sup>-/-</sup>; *kdm6bb*<sup>-/-</sup> double mutant larvae. Each point represents an individual fish. The p-value is from a two-tailed Student's *t*-test.

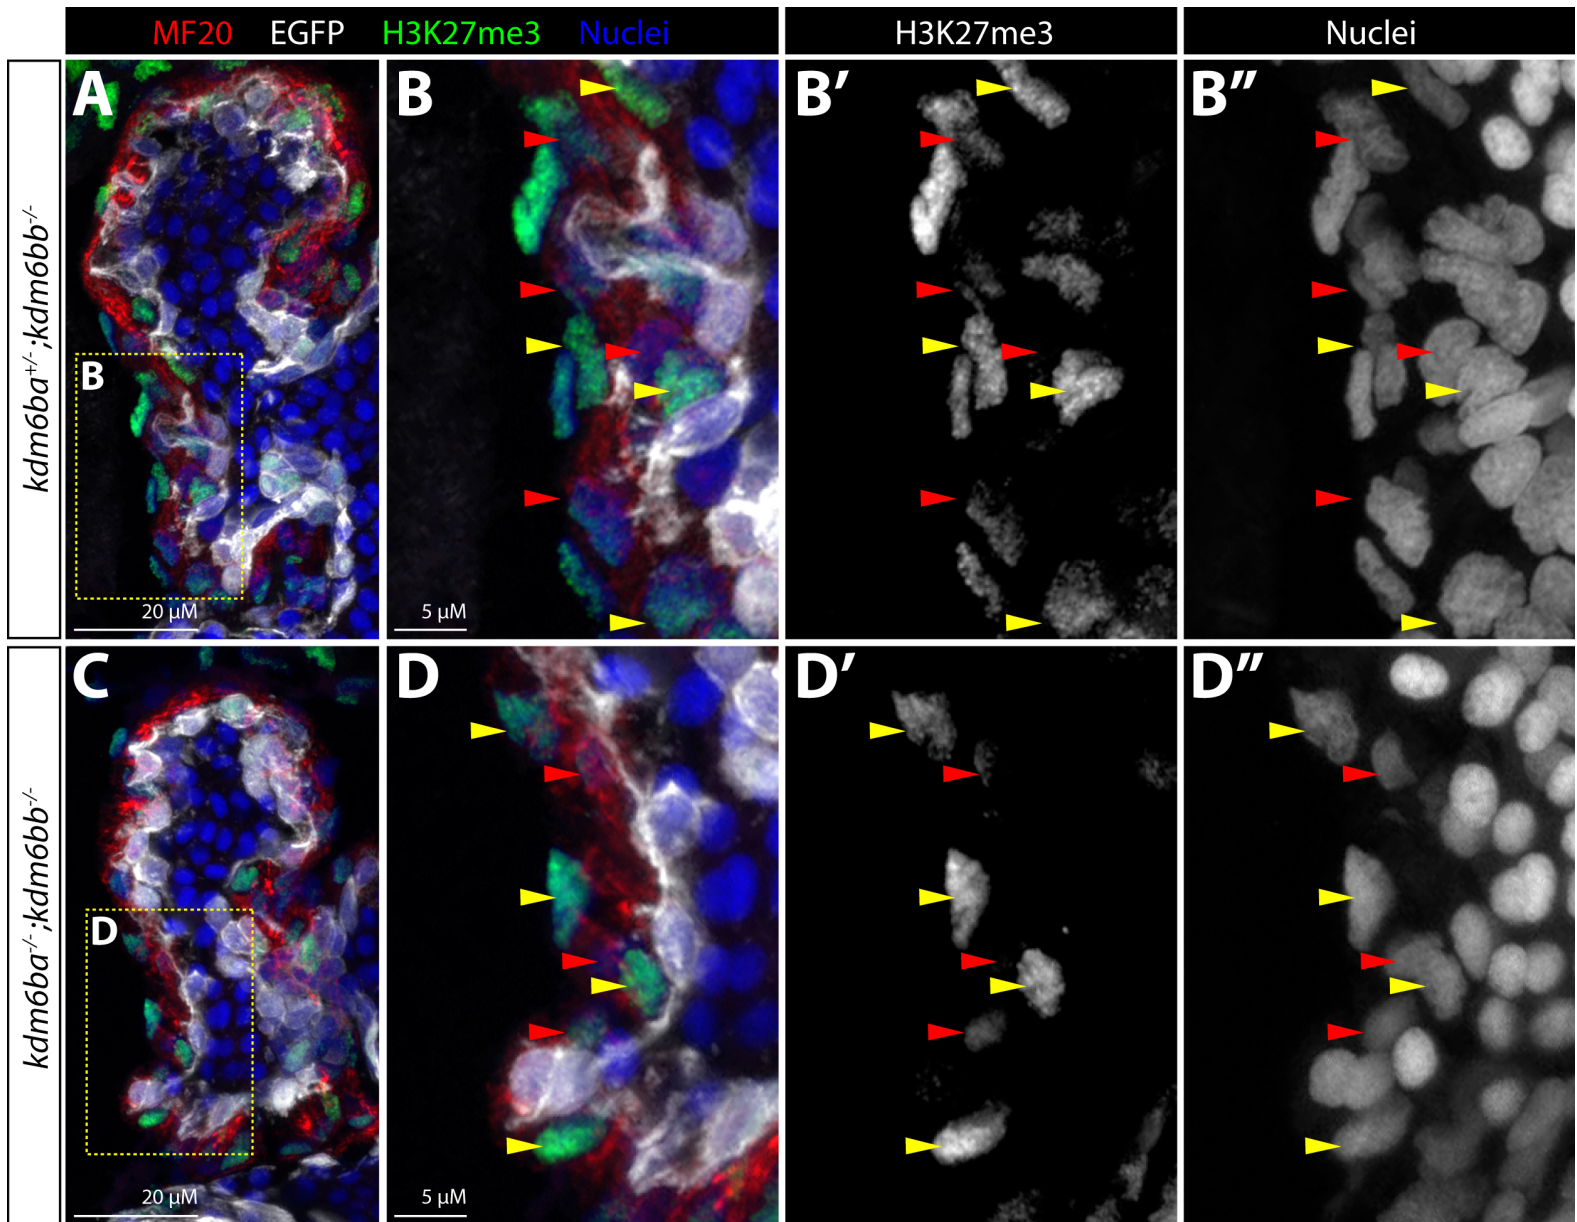

**Figure S5. *kdm6ba/bb* are not required for the transient depletion of bulk H3K27me3 levels in trabeculating cardiomyocytes.**

(A-D'') Confocal microscopy immunofluorescence images of sections through the hearts of 3 dpf *Tg(kdrl:EGFP)* control and *kdm6ba/bb*-deficient embryos stained with anti-myosin heavy chain (red, MF20, myocardium), anti-EGFP (white, endocardium), and anti-H3K27me3 (green) antibodies with Hoechst-stained nuclei in blue (A, B, C, D). Yellow boxed areas in A and C are shown zoomed in B-B'' and D-D'' respectively with grey-scale single channel images of H3K27me3 staining (B', D') and nuclei (B'', D''). Arrowheads indicate myocardial cells with robust (yellow) or depleted (red) bulk H3K27me3 levels. 20  $\mu$ M and 5  $\mu$ M scale bars are shown.

**Movie S1. *kdm6b*-deficient zebrafish have malformed but functioning heart ventricles.**

Whole mount DIC microscopy movie showing blood flow through the hearts and nearby tissue of live 5 dpf *kdm6ba*<sup>+/-</sup>; *kdm6bb*<sup>+/-</sup> (left) and *kdm6ba*<sup>-/-</sup>; *kdm6bb*<sup>-/-</sup> (right) clutch mate larvae. Larvae are imaged ventrally and oriented anterior up.
